# Supplementary material for: Life, Trauma, and Growth in Adult Female Survivors of Bam Earthquake: The Phenomenology of 16-Year Post-Earthquake Lived Experience
Source: Research Square preprint supplement (doi:10.21203/rs.3.rs-514117/v1), 2021-05-20
Supplement: Supplementary file 1 [file 0b9177d6773b2023b4703d49.docx]

| **Table 3. Interviewer’s considerations in interviews** |
| --- |
| The interview questions followed no pre-determined order. When an interviewee answered the first question on his/her life stages referred to the researcher's subject, complementary questions were asked to find an answer to the researcher's questions. At the same time, the researcher guided the interview process and prevented being diverted from the main topic. |
| The researcher learnt by heart the questions so that there was no need to use pen and paper during the interview. |
| The questions were asked neutrally not to guide or inspire biases. |
| Open-ended questions were used to encourage the interviewees to share their experiences to the largest extent possible. |
| During each individual interview, the interviewer spared his effort to gain the interviewees’ trust and to ask more sensitive questions after establishing an in-depth relationship. |
| Leading questions were avoided not to affect the collected information. |
