# Supplementary material for: Life, Trauma, and Growth in Adult Female Survivors of Bam Earthquake: The Phenomenology of 16-Year Post-Earthquake Lived Experience
Source: Research Square preprint supplement (doi:10.21203/rs.3.rs-514117/v1), 2021-05-20
Supplement: Supplementary file 3 [file 479d9e041ddbd34de5adf33e.docx]

| **Table S1. Participants’ demographic information** | | | | |
| --- | --- | --- | --- | --- |
| Participants | Age at the time of the earthquake (years) | The experience of being under the rubble | Marital status | Number of lost family members |
| 1 | 6.5 | No | Single | - |
| 2 | 7 | Yes | Single | - |
| 3 | 15 | Yes | Single | One (mother) |
| 4 | 9 | No | Married | - |
| 5 | 18 | No | Divorced | Two- (mother-brother) |
| 6 | 14 | No | Married | - |
| *Note*. Pseudonyms are assigned to each participant to maintain confidentiality. | | | | |
