# Supplementary material for: Life, Trauma, and Growth in Adult Female Survivors of Bam Earthquake: The Phenomenology of 16-Year Post-Earthquake Lived Experience
Source: Research Square preprint supplement (doi:10.21203/rs.3.rs-514117/v1), 2021-05-20
Supplement: Supplementary file 4 [file c37f153f1e9d8d29c154d854.docx]

| **Table 4. Research themes and subthemes** | | | |
| --- | --- | --- | --- |
| No. | Themes (Frequency) | Sub-themes (Frequency) | Description |
| **I** | Life before the earthquake (6) | Economic status and resources (6) | It was formed in response to the request to chapter ones’ book of life. All the stories of living conditions began and expanded from the participants’ childhood to the earthquake. |
|  |  | Relationship network (6) |
|  |  | Earthquake, what we had thought about (5) |
|  |  |  |
| **II** | Earthquake (5) | At the time of the earthquake and escaping (6) | The interviewees described the earthquake and what happened on the day of the earthquake, from staying under the rubble to escaping and witnessing their families' death and injury. |
|  |  | Environmental conditions (5) |
|  |  | Family’s death and injury (5) |
|  |  | Physical injuries (2) |
|  |  | Getting shocked (6) |
|  |  |  |  |
| **III** | First days after the earthquake (6) | Tough emotional conditions (6) | This theme deals with the critical days from the day after the earthquake until the day when the first positive event happened. It also discusses various types of difficulties with which the participants were struggling during the same days. |
|  |  | Obligatory migration (6) |
|  |  | Shortage of resources (6) |
|  |  |  |  |
| **IV** | Back to life (6) | First positive events (6) | This theme introduces different techniques by which the participants can return to normal life and overcome their problems. |
|  |  | Membership in new Families: Earthquake Victims (6) |
|  |  | Effective defense mechanisms (6) |
|  |  | Others’ support (6) |
|  |  |  |  |
| **V** | Fear, a feeling that became more highlighted (6) | Fear of death (5) | It discusses emotions felt and experienced by the participants more intensely than the same emotions under normal condition in their previous lives before the earthquake classmates (e.g., fear) |
|  |  | Fear of intimacy (6) |
|  |  |  |  |
| **VI** | An intimate friend, called "regret" (6) | Earthquake reconstruction by other narrations (6) | It well-describes how regret converted to an intimate friendship and accompanied the participants throughout all moments of their life from the day of the earthquake up to now. |
|  |  | Homesickness (6) |
|  |  |  |  |
| **VII** | Posttraumatic Growth (6) | Increased capacity for compassion (6) | It deals with the powers bestowed to the victims by the earthquake. Such powers might not have emerged with such quality and depth under any other condition. This might be the only point of the story that encouraged the participants. |
|  |  | Insignificance of material issues (6) |
|  |  | Promoted mental capacity (6) |
